# Supplementary material
Source: PubMed Central journal article supplement (PMC5514669)
Supplement: AEM.00280-17_zam999117974s1.pdf [file AEM.00280-17_zam999117974s1.pdf]

# Supplemental Material

## Engineering of the hyperthermophilic archaeon *Thermococcus kodakarensis* for chitin-dependent hydrogen production

Mehwish Aslam<sup>1</sup>, Ayumi Horiuchi<sup>1</sup>, Jan-Robert Simons<sup>1,2</sup>, Savyasachee Jha<sup>1,2</sup>, Masahiro Yamada<sup>1</sup>, Toru Odani<sup>1</sup>, Rikako Fujimoto<sup>1</sup>, Yasuyuki Yamamoto<sup>1</sup>, Ryoma Gunji<sup>1</sup>, Tadayuki Imanaka<sup>2,3</sup>, Tamotsu Kanai<sup>1,2</sup>, Haruyuki Atomi<sup>1,2\*</sup>

<sup>1</sup>Department of Synthetic Chemistry and Biological Chemistry, Graduate School of Engineering, Kyoto University, Katsura, Nishikyo-ku, Kyoto, Japan

<sup>2</sup>JST, CREST, Chiyoda-ku, Tokyo, Japan

<sup>3</sup>Research Organization of Science and Technology, Ritsumeikan University, Kusatsu, Shiga, Japan

\*To whom correspondence should be addressed: [atomi@sbchem.kyoto-u.ac.jp](mailto:atomi@sbchem.kyoto-u.ac.jp)

**Supplementary Table S1. Specific growth rates of engineered strains of *T. kodakarensis* in ASW-YT-Pyr medium**

| Strains  | Specific growth rate (h <sup>-1</sup> ) |
|----------|-----------------------------------------|
| KOD1     | 0.47 ± 0.03                             |
| KU216    | 0.45 ± 0.04                             |
| KC01     | 0.39 ± 0.04                             |
| KC04     | 0.40 ± 0.05                             |
| KU216Δt  | 0.37 ± 0.02                             |
| KC04Δt   | 0.34 ± 0.03                             |
| KC04ΔtM1 | 0.42 ± 0.05                             |

The data represents the average of four independent cultures and are shown with standard deviations.

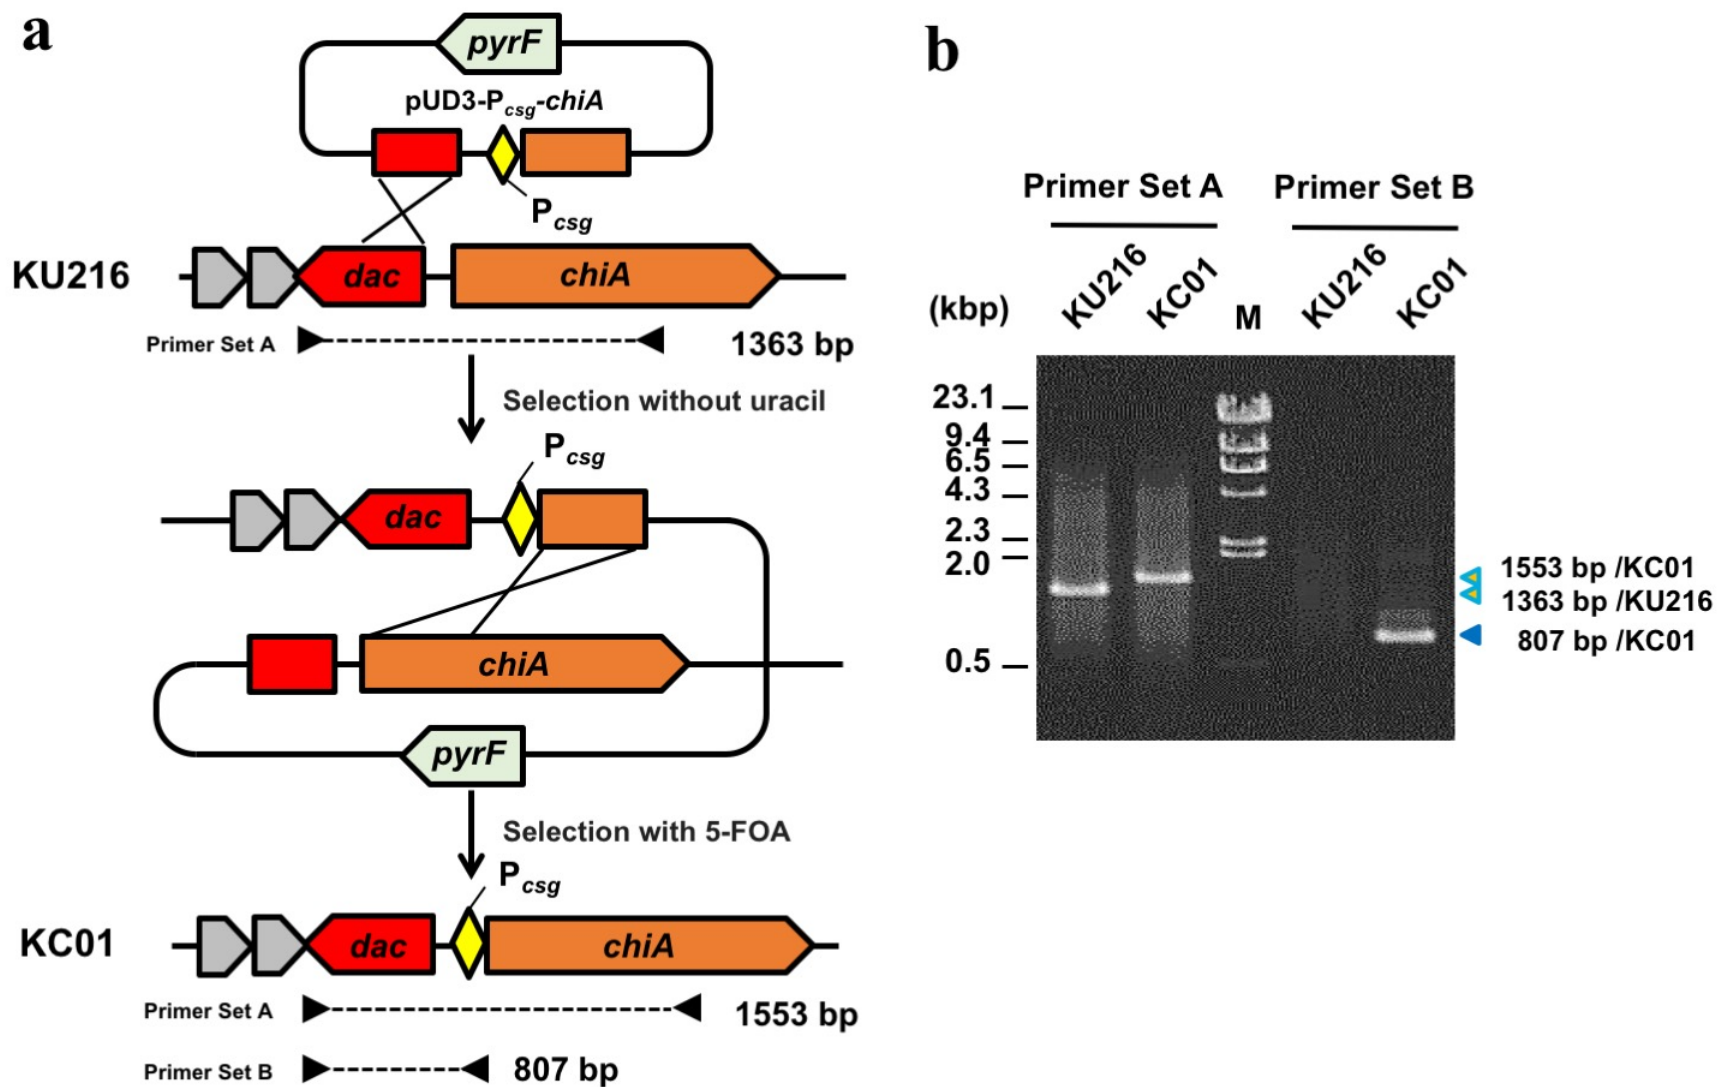

**Fig. S1 Construction of a ChiA overexpression strain of *T. kodakarensis*.** (a) A general strategy to construct strain KC01 via single-crossover insertion/pop-out recombination. A strong promoter ( $P_{csg}$ ) was placed just before *chiA* ORF (b) Insertion of  $P_{csg}$  was confirmed by PCR using Primer Set A (attached in *dac* or *chiA*) and Primer Set B (attached in  $P_{csg}$  promoter or *dac*). Analysis by Primer Set A shows an amplified product (1363bp) in KU216, while a longer product (of 1553bp) was amplified in in KC01 as a result of  $P_{csg}$  insertion. Analysis by Primer Set B does not give any product in the case of KU216, while a product (of 807bp) is amplified for KC01, indicating the presence of  $P_{csg}$  next to *dac*.

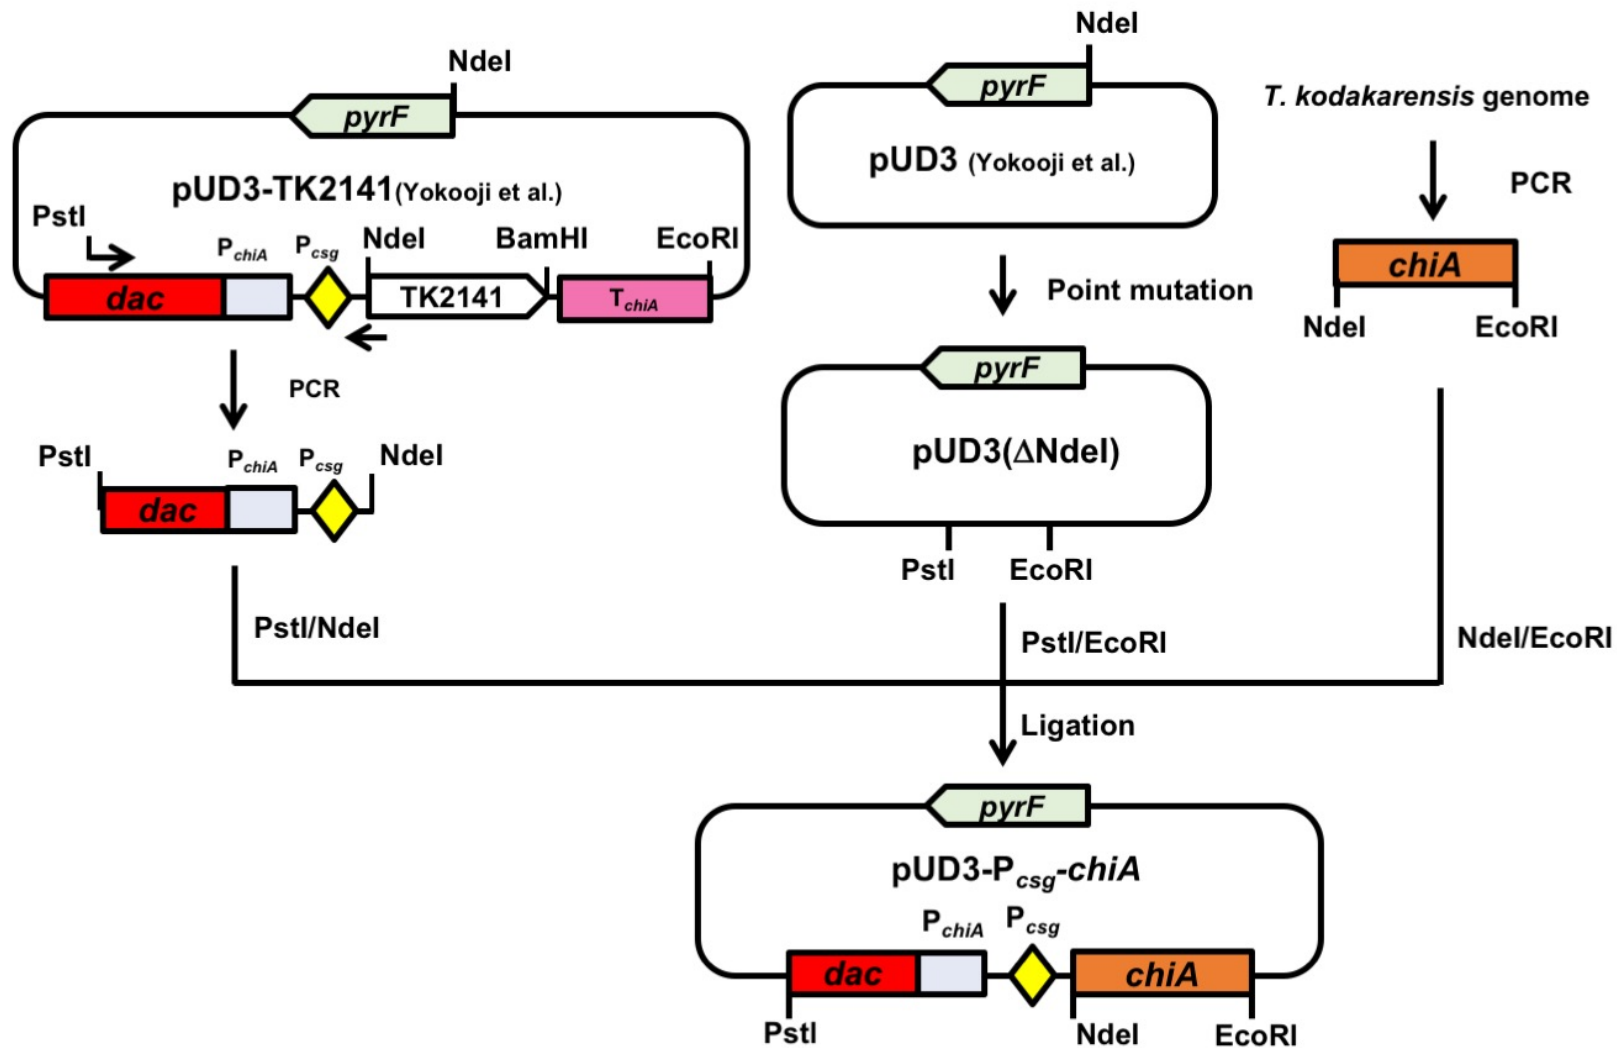

Fig. S2 Construction of the *chiA* overexpression vector pUD3-P<sub>csg</sub>-*chiA*.

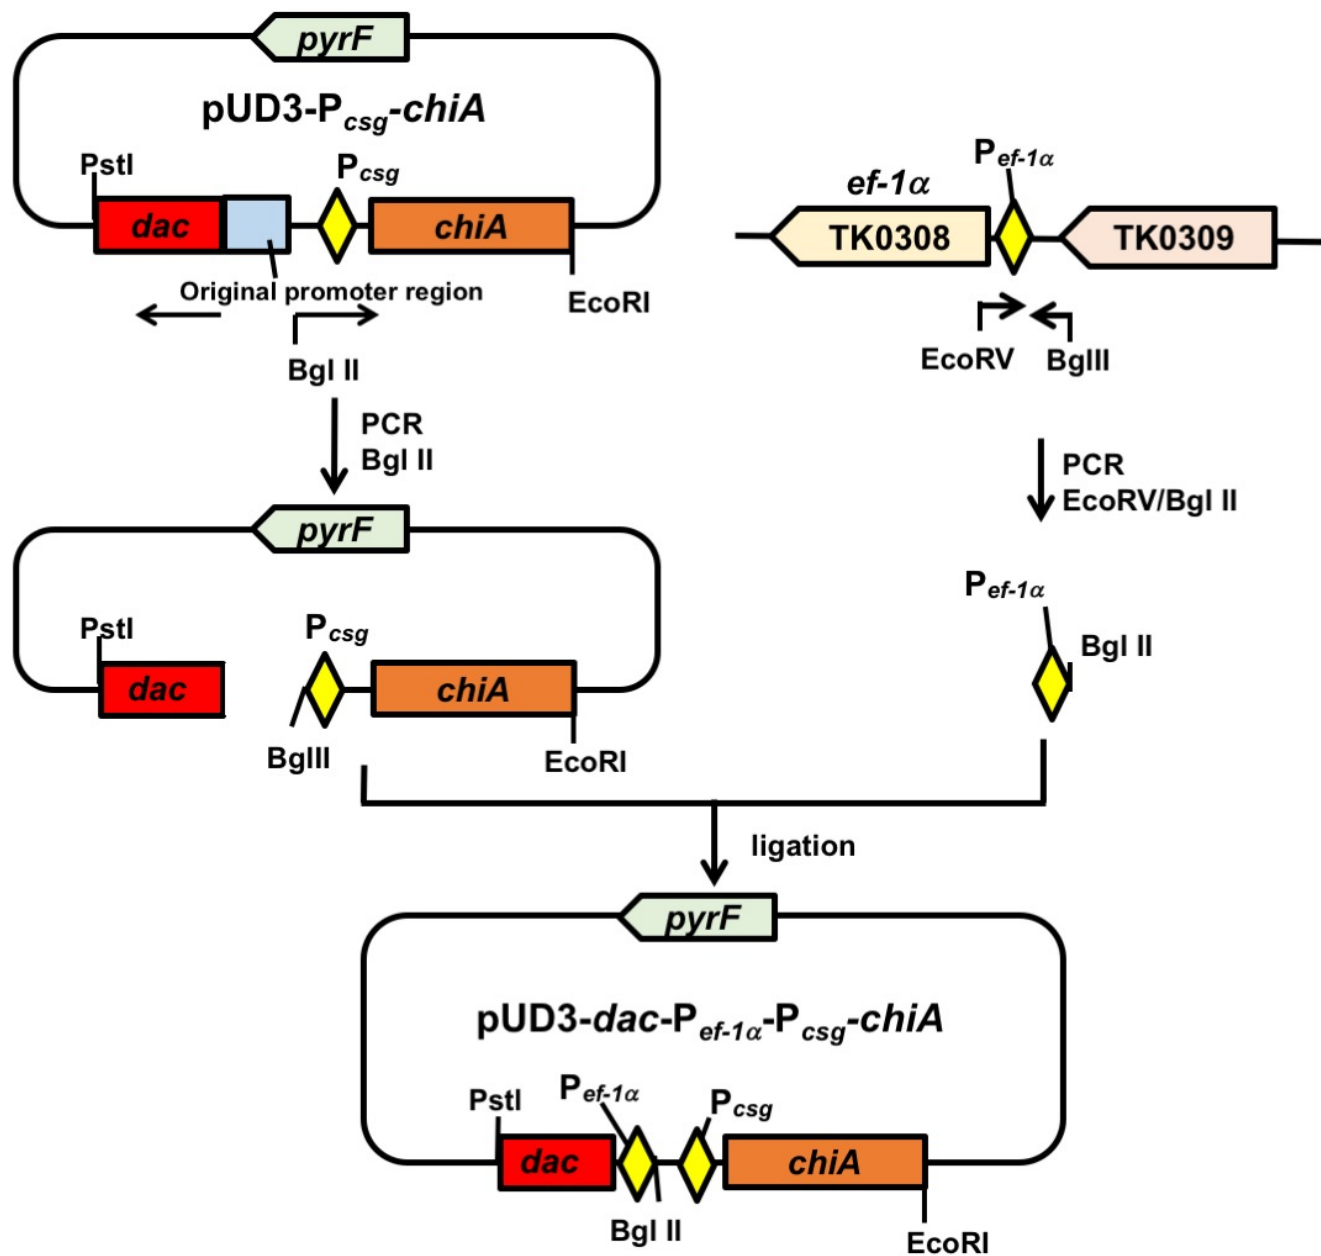

Fig. S3 Construction of the *lac* and *chiA* overexpression vector  $pUD3-dac-P_{ef-1\alpha}-P_{csg}-chiA$ .

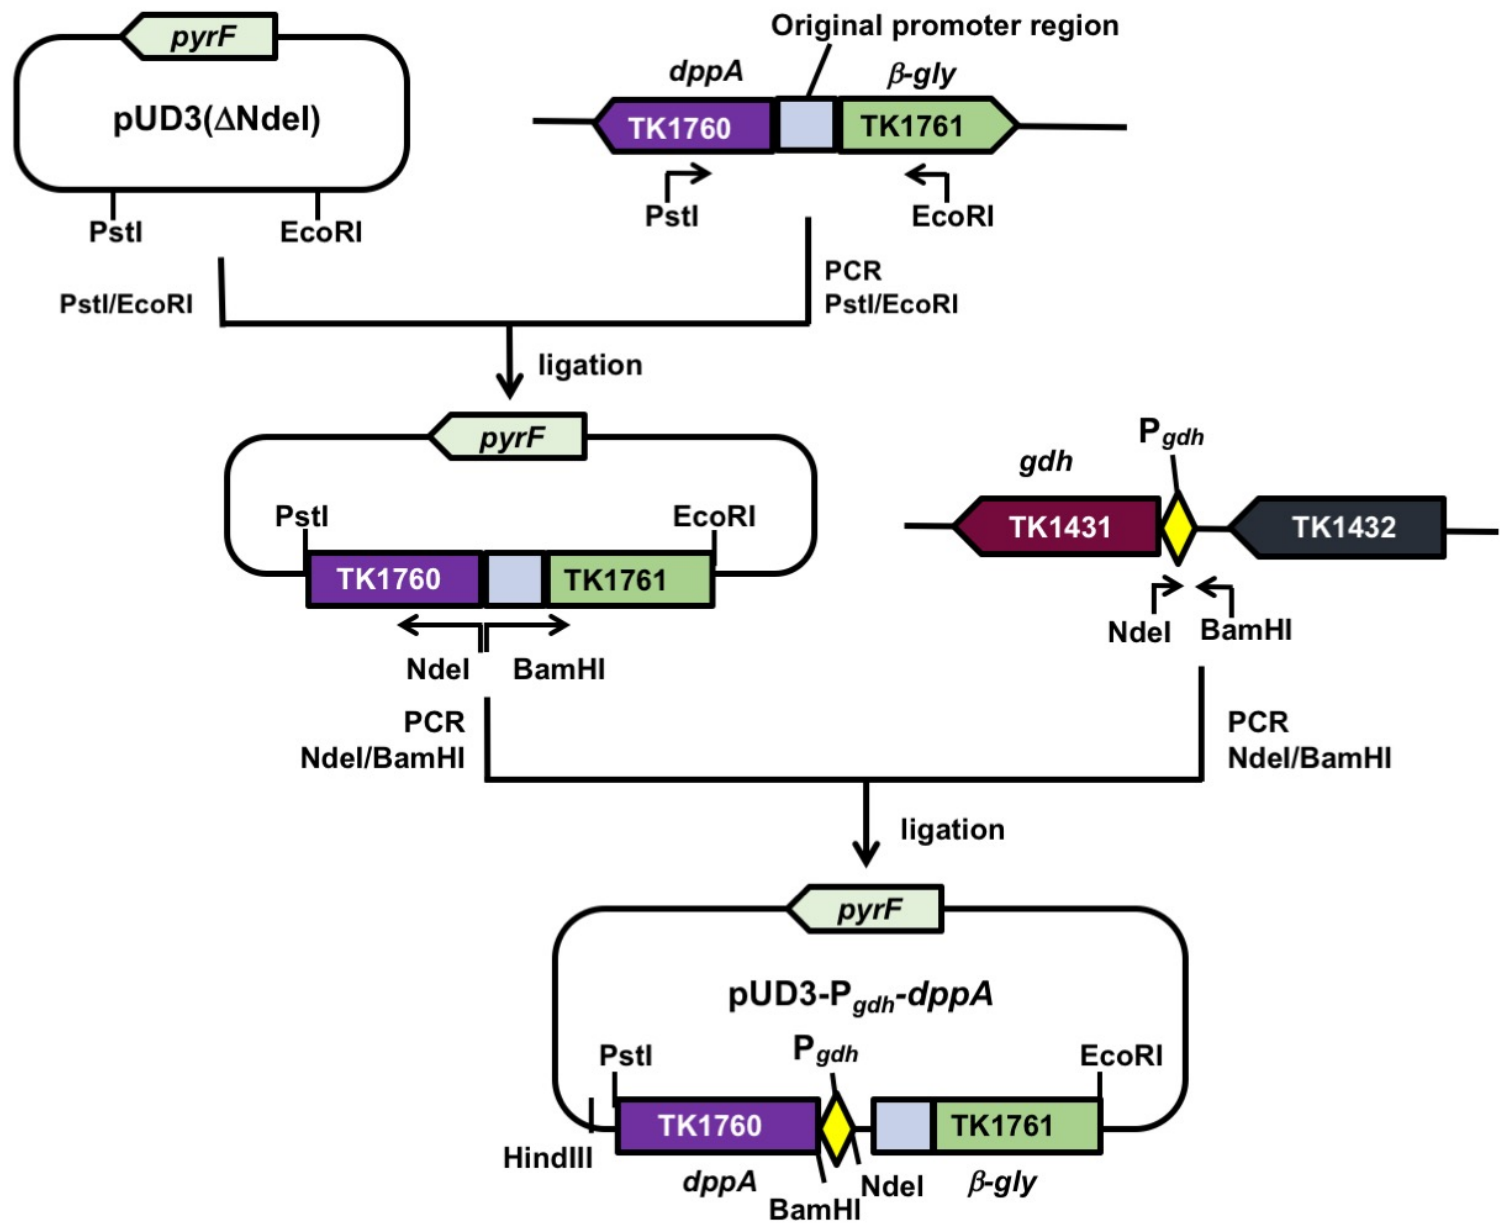

Fig. S4 Construction of the plasmid  $pUD3-P_{gdh-dppA}$  for overexpression of ABC transporter genes,  $glmD$  and  $glmA$ .

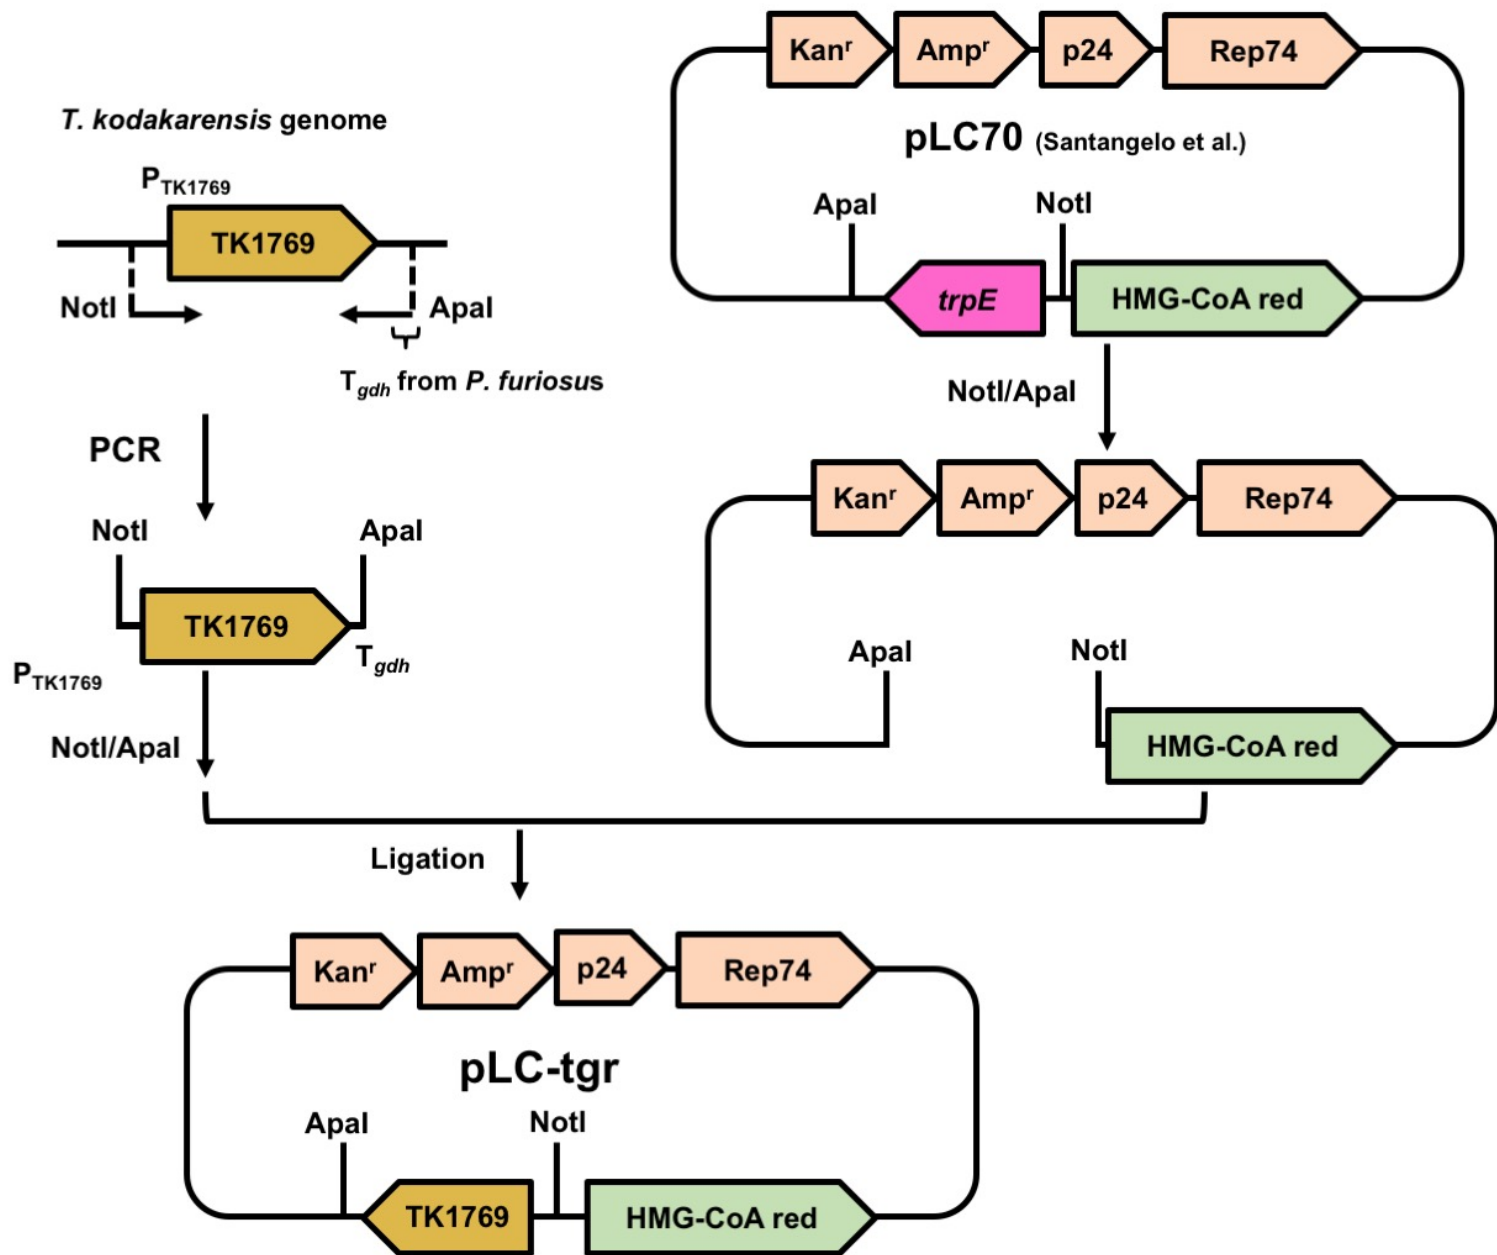

**Fig. S5 Construction of the plasmid pLC-tgr for complementation of *tgr*.** The region containing *trpE* in pLC70 was replaced by TK1769 (*tgr*). HMG-CoA reductase was used as a selectable marker for transformation.

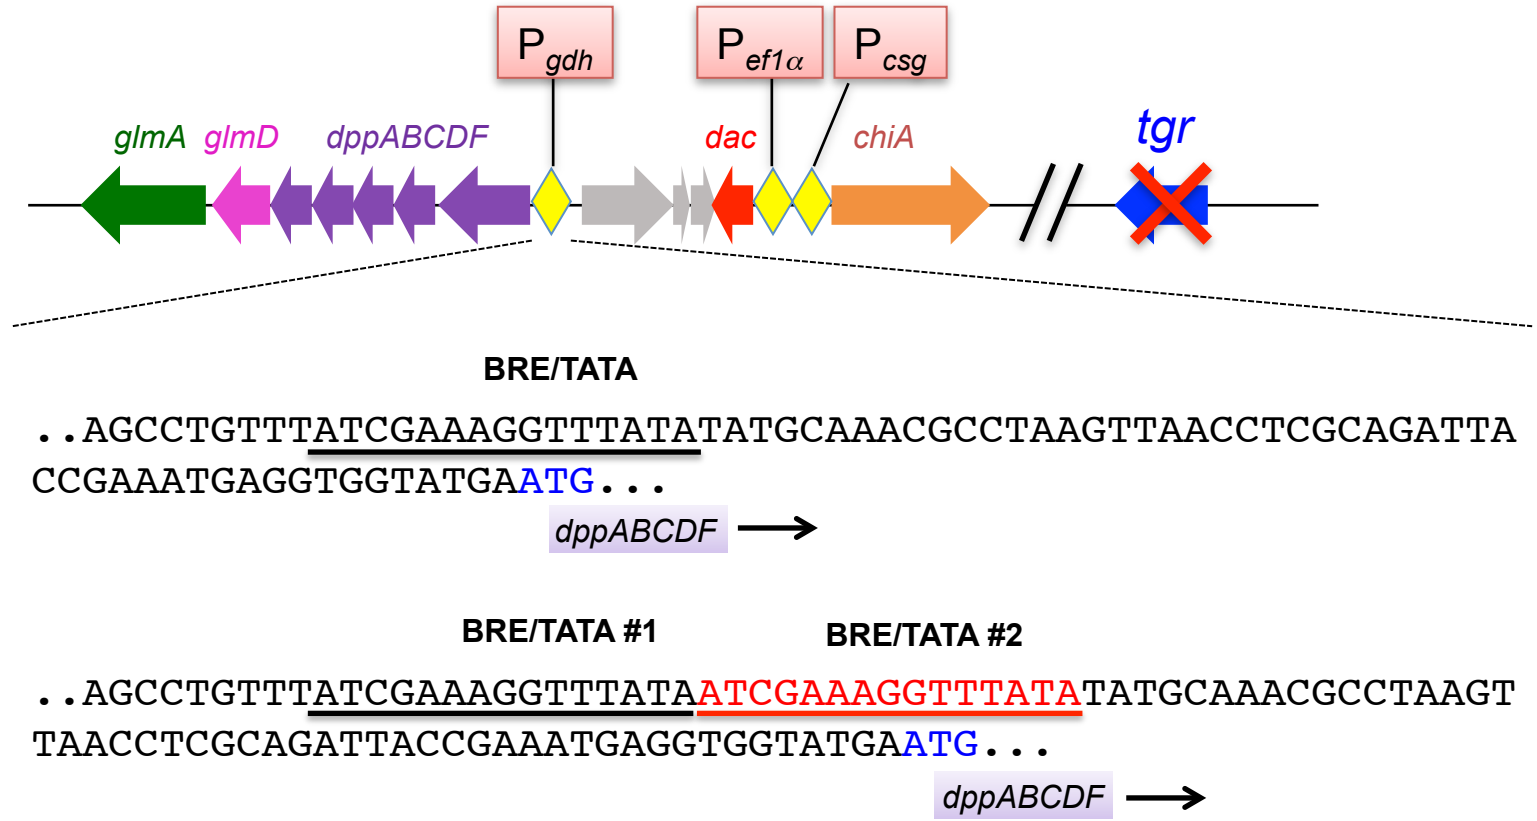

**Fig. S6 Comparison in sequences in  $P_{gdh}$  regions of KC04Δt and KC04ΔtM1.** A 15bp repeat sequence (underline) was found in BRE/TATA region of  $P_{gdh}$  in strain KC04ΔtM1 (shown as BRE/TATA #1 and BRE/TATA #2), which is not present in strain KC04Δt (the parental strain).



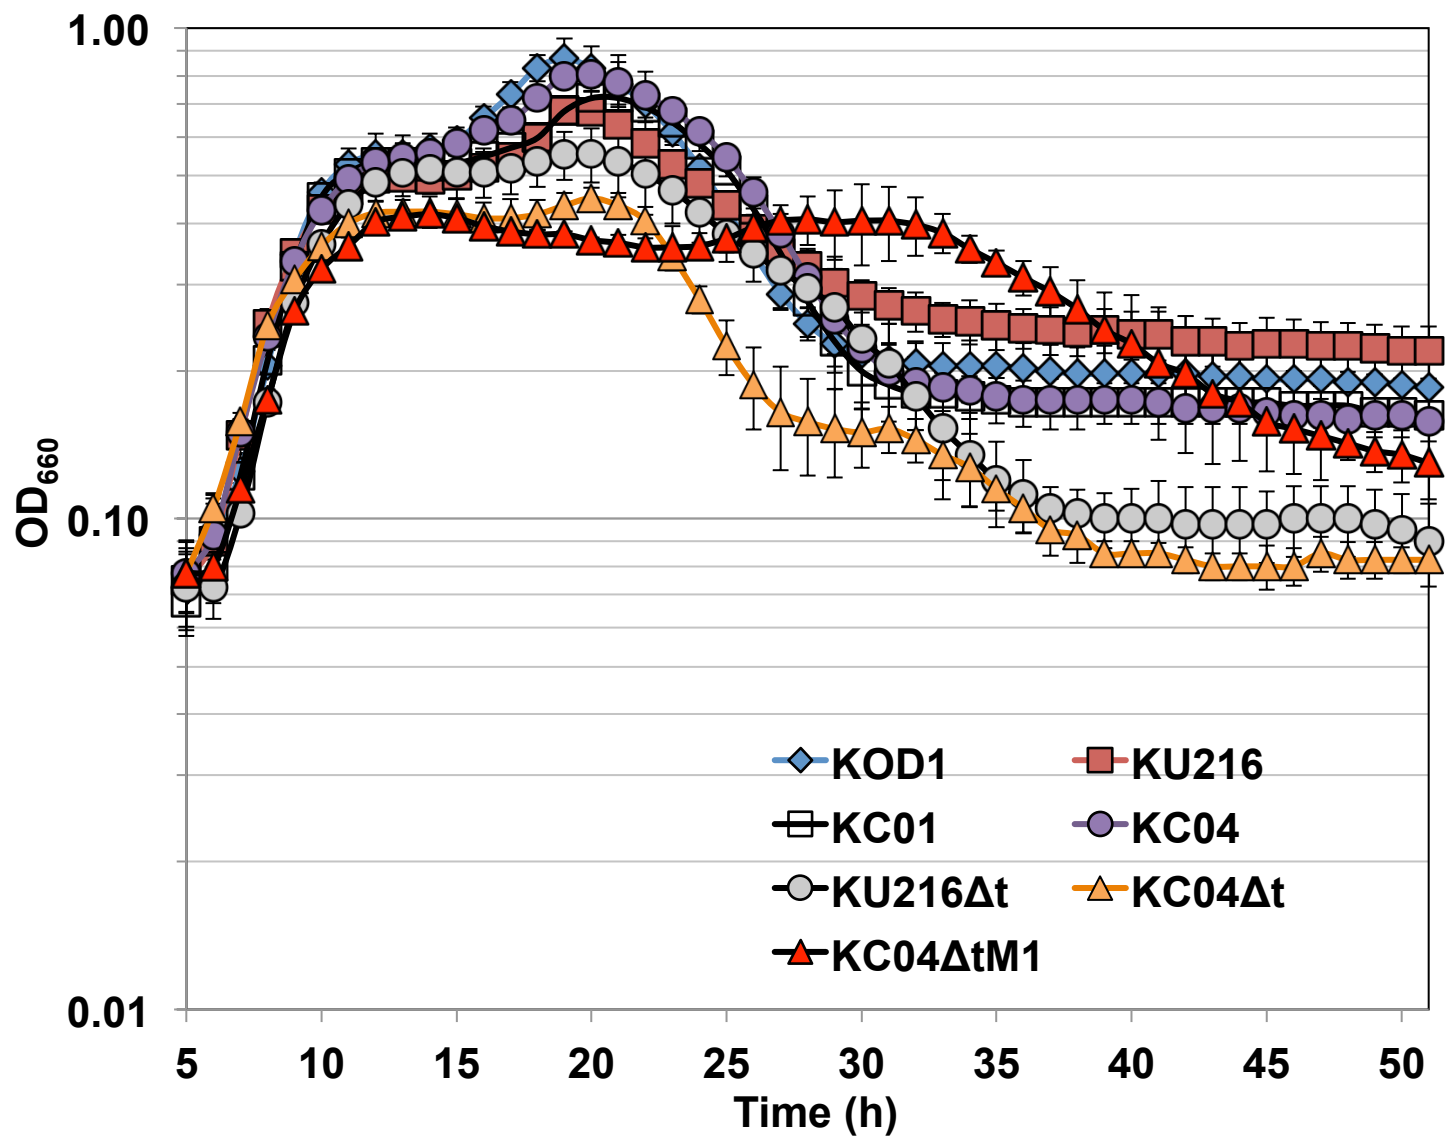

**Fig. S7. Growth curve of *T. kodakarensis* strains in ASW-YT-Pyr medium.** Batch cultivation of each strain was carried out at 85°C. Error bars represent the standard deviations of four independent growth experiments. We observed a tendency that strains with a higher number of overexpressed genes exhibited lower specific growth rates.

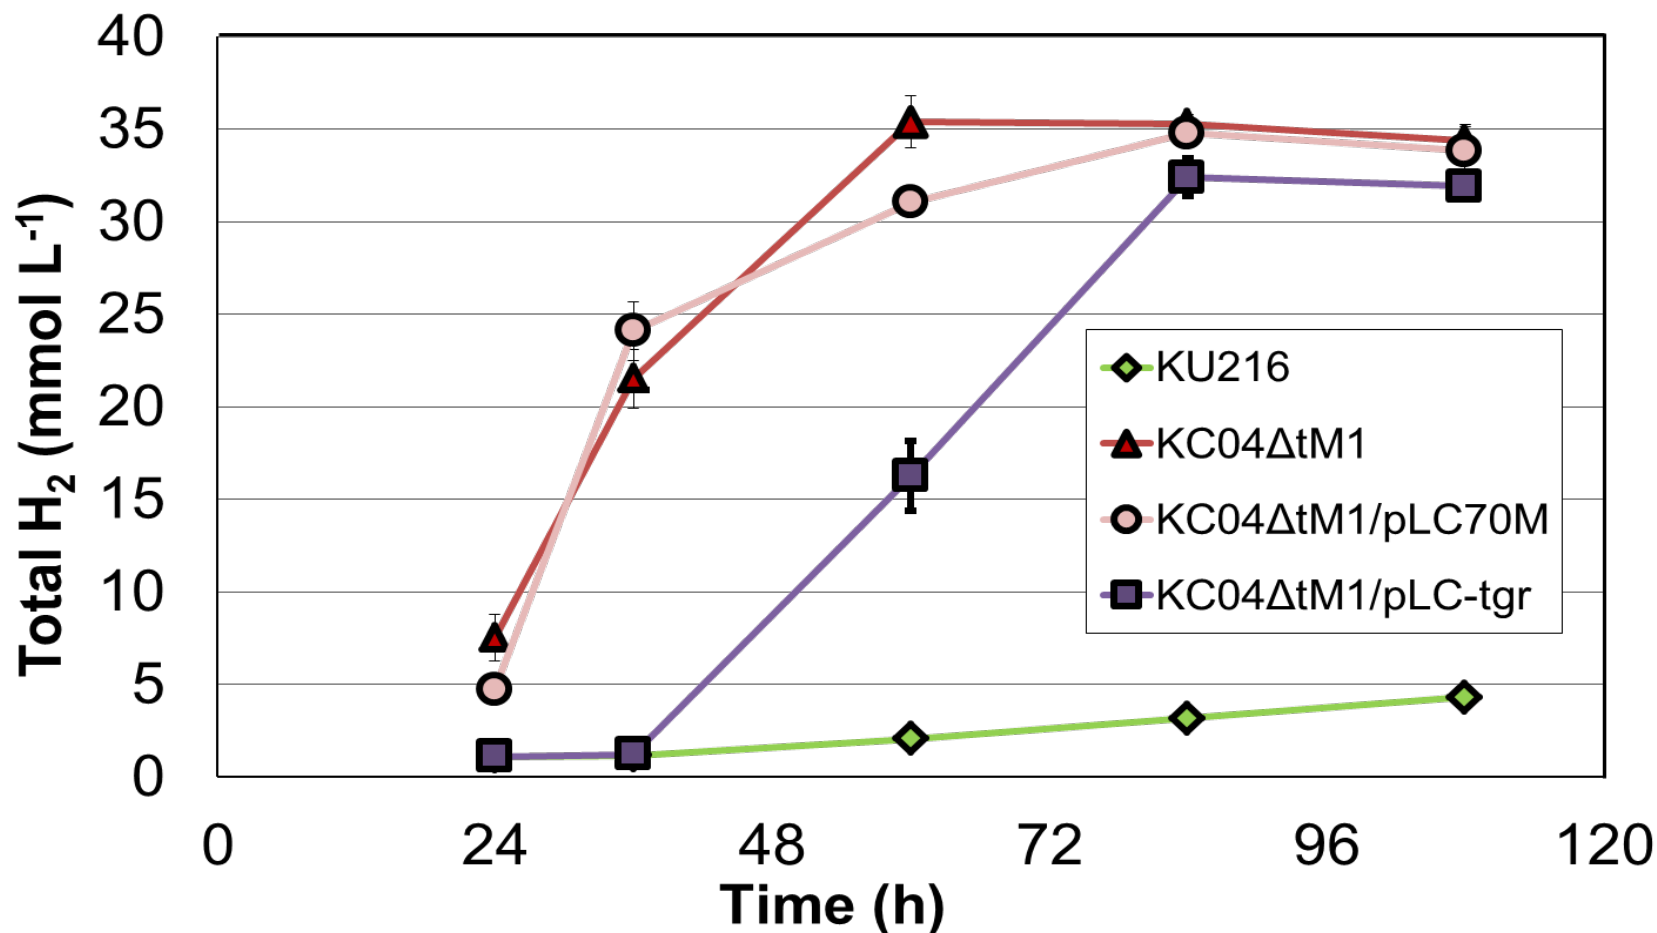

**Fig. S8 Effect of *tgr* gene reintroduction on chitin-dependent hydrogen (H<sub>2</sub>) production in KC04ΔtM1.** KU216 is shown in *green* and *diamonds*, while KC04ΔtM1 is shown in *red* and *triangles*. KC04ΔtM1 complemented with pLC70M is shown in *pink* and *circles*, while KC04ΔtM1 complemented with pLC-tgr is shown in *purple* and *squares*. Cultivation was performed with ASW-VMT-SC medium at 85°C. Total H<sub>2</sub> (mmol L<sup>-1</sup>) represents the amount of molecular hydrogen present in the headspace of a culture bottle per mL of culture volume (media volume was 15 mL). Error bars represent standard deviations of three independent cultivations. Reintroduction of Tgr gene to KC04ΔtM1 results in a delay in the H<sub>2</sub> production.

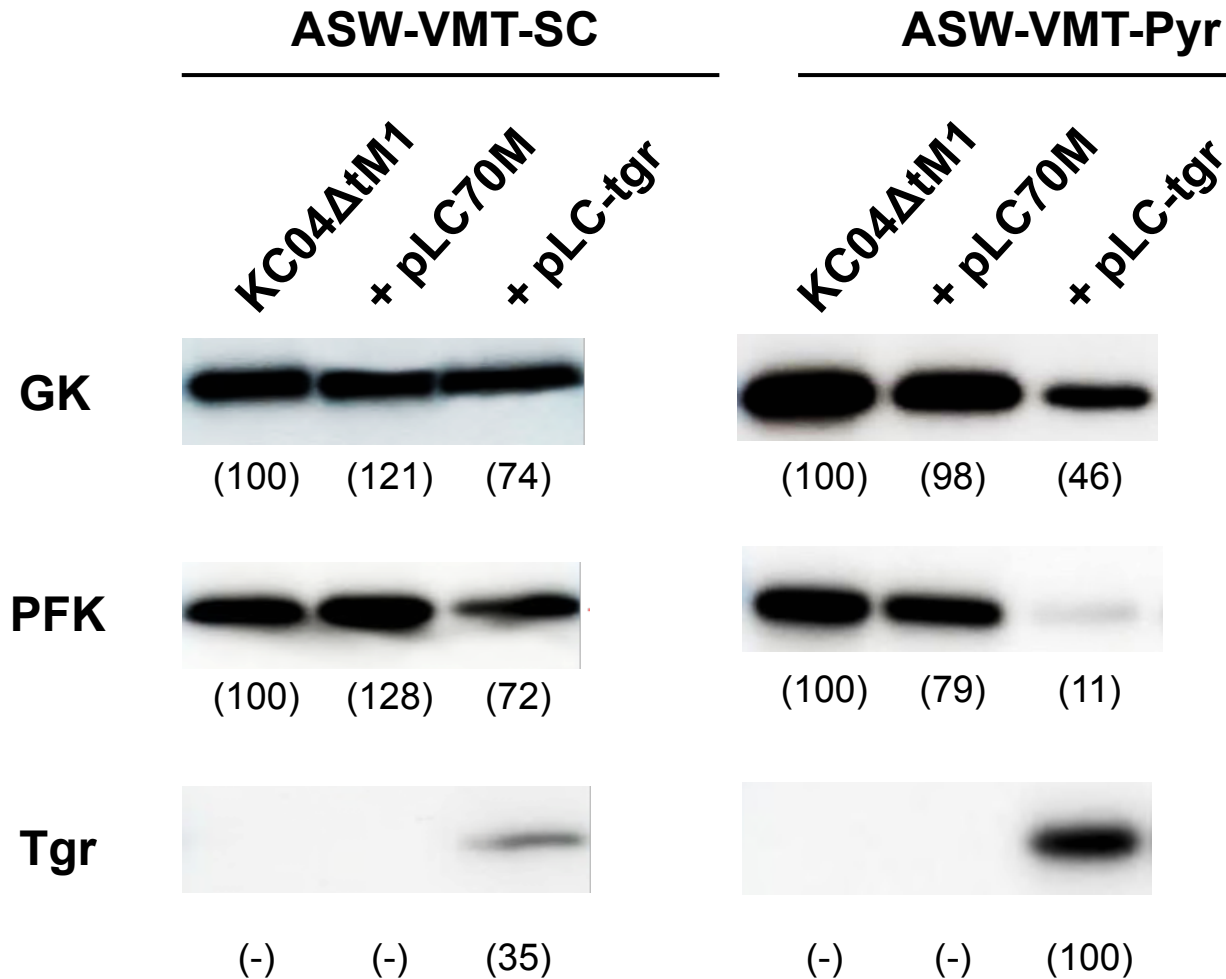

**Fig. S9 Expression levels of GK, PFK and Tgr detected by Western blot analyses.** Western blot analysis of GK, PFK and Tgr was performed with cell-free extracts from KC04ΔtM1, and KC04ΔtM1 strains complemented with pLC70M or pLC-tgr. Cells were cultivated at 85°C in ASW-VMT-SC or ASW-VMT-Pyr media. Numbers in parentheses indicate band intensities (%) relative to that of KC04ΔtM1 cultivated in the same medium condition (which is defined as 100%). In the case of quantification of Tgr, the amount of KC04ΔtM1 harboring pLC-tgr cultivated in ASW-VMT-Pyr medium was set as 100%. Tgr gene introduction to KC04ΔtM1 represses expressions of GK and PFK in ASW-VMT-Pyr medium, while the effects of repression are much lower in ASW-VMT-SC medium.

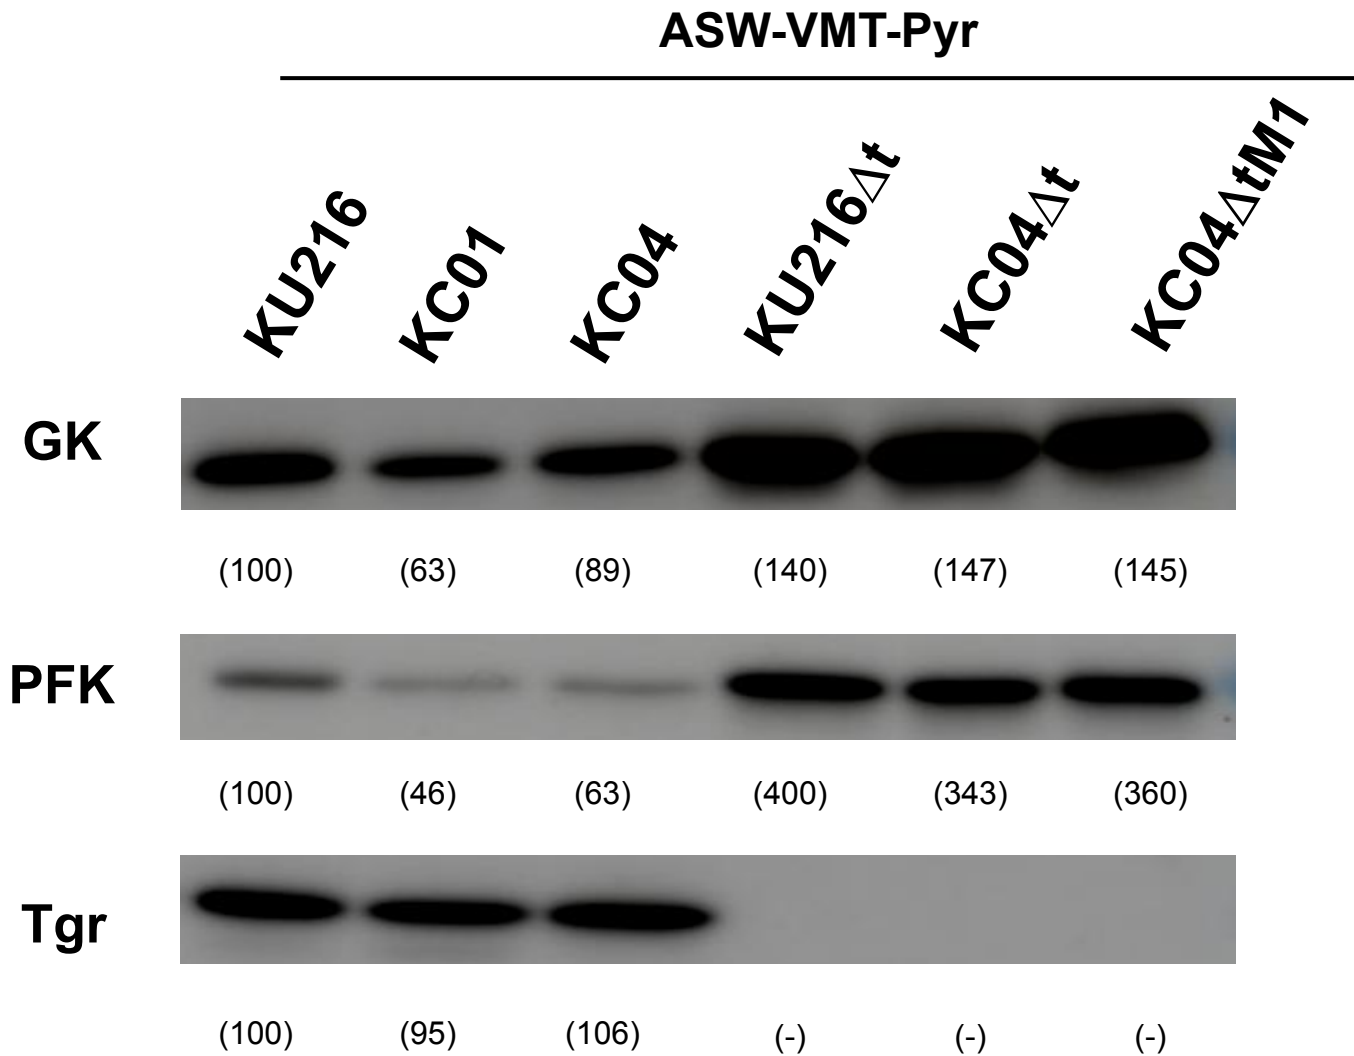

**Fig. S10 Expression levels of GK, PFK and Tgr detected by Western blot analyses.** Western blot analysis of GK, PFK and Tgr was performed with cell-free extracts from *KU216*, *KC01*, *KC04*, *KU216 $\Delta$ t*, *KC04 $\Delta$ t* and *KC04 $\Delta$ tM1* strains. Cells were cultivated at 85°C in ASW-VMT-Pyr media. Equal amount (3  $\mu$ g) of protein was loaded on each lane for GK and PFK, while 10  $\mu$ g of protein was loaded in the case of Tgr. Numbers in parentheses indicate band intensities (%) relative to that of *KU216* (which is defined as 100%). Expression levels of GK and PFK are much higher in the *Tgr* gene knockout strains (*KU216 $\Delta$ t*, *KC04 $\Delta$ t* and *KC04 $\Delta$ tM1*) compared to those of strains that harbor the *Tgr* gene.
